# Supplementary material for: Effectiveness of Web-Based Tailored Advice on Parents’ Child Safety Behaviors: Randomized Controlled Trial
Source: PubMed Central journal article supplement (PMC3913924; doi:10.2196/jmir.2521), 2014-01-24
Supplement: jmir_v16i1e17_app6.pdf [file jmir_v16i1e17_app6.pdf]

**Appendix 6.** Child characteristics at baseline and follow-up divided in intervention condition and control condition (n=1292)

|                                                               | <i>Intervention<br/>condition</i> | <i>Control condition</i><br>n=649 | <i>P-value*</i> |
|---------------------------------------------------------------|-----------------------------------|-----------------------------------|-----------------|
| [missing data baseline-follow-up]                             | n=643                             |                                   |                 |
|                                                               | <i>Baseline</i>                   |                                   |                 |
| Mean age (SD; range), months [8-0]                            | 7.3 (1.1); 4.7-11.6               | 7.2 (1.1); 4.8-11.5               | .17             |
| Child can crawl (%) [0-3]                                     | 35.9                              | 32.7                              | .14             |
| Child can walk (%) [0-1]                                      | 0.4                               | 0.4                               | .99             |
| Lifetime prevalence of medically<br>attended injury (%) [3-6] | 3.0                               | 2.7                               | .39             |
|                                                               | <i>Follow-up</i>                  |                                   |                 |
| Mean age (SD; range), months [8-0]                            | 16.8 (0.7); 15.8-<br>22.5)        | 16.8 (0.8); 15.6-<br>21.7)        | .72             |
| Child can crawl (%) [0-3]                                     | 98.6                              | 9.2                               | .28             |
| Child can walk (%) [0-1]                                      | 89.4                              | 86.5                              | .12             |
| Lifetime prevalence of medically<br>attended injury (%) [3-6] | 10.3                              | 8.3                               | .30             |

\* Differences between intervention condition and control condition, tested with independent-samples t-test (continuous variables) and Chi-square test (categorical variables)
