# Supplementary material for: Effectiveness of Web-Based Tailored Advice on Parents’ Child Safety Behaviors: Randomized Controlled Trial
Source: J Med Internet Res. 2014 Jan 24;16(1):e17. doi: 10.2196/jmir.2521 (PMC3913924; doi:10.2196/jmir.2521)
Supplement: Supplementary file 1 [file jmir_v16i1e17_app1.pdf]

**Appendix 1.** Safety advice of the intervention based on safety behavior in and around the home.

| <i>Safety behavior concerning the prevention of</i> | <i>Applicable if:</i>                                 | <i>Reinforcement or NO advice when:</i>                                                         |
|-----------------------------------------------------|-------------------------------------------------------|-------------------------------------------------------------------------------------------------|
| <b>Falls</b>                                        |                                                       |                                                                                                 |
| - Stair gate                                        | - The house has a staircase which the child can reach | - A stair gate is present at the top and bottom of the staircase and is being used at all times |
| - Windows                                           | - The house has windows a child can reach             | - A window restrictor is present                                                                |
| <b>Poisoning</b>                                    |                                                       |                                                                                                 |
| - Cleaning products                                 | - Always                                              | - Stored in a closet with a lock or higher than 1.50 meters                                     |
| - Medicines                                         | - Always                                              | - Stored in a closet with a lock or higher than 1.50 meters                                     |
| <b>Drowning</b>                                     |                                                       |                                                                                                 |
| - Bath tub                                          | - The child takes a bath                              | - Never left alone in the bath tub                                                              |
| - Pond                                              | - There is a pond present                             | - A fence higher than 1.20 meters is present around the pond                                    |
| - Private swimming pool                             | - There is a swimming pool present                    | - A fence higher than 1.20 meters is present around the swimming pool                           |
| - Swimming                                          | - The child swims                                     | - The child always wears a flotation device and is never left alone in the swimming pool        |
| <b>Burns</b>                                        |                                                       |                                                                                                 |
| - Hot water taps of bath/shower                     | - Always                                              | - Thermostat-controlled tap present                                                             |
| - Hot fluids                                        | - Always                                              | - Child never on parents lap when drinking hot drinks                                           |
| - Cooking                                           | - Always                                              | - A stove guard is present                                                                      |
| - Cooking                                           | - Always                                              | - Child never in the kitchen when cooking                                                       |
| - Cooking                                           | - Always                                              | - Always using rear hotplates during cooking                                                    |
| - Cooking                                           | - Always                                              | - Always turning panhandles away during cooking                                                 |
