# Supplementary material for: Effectiveness of Web-Based Tailored Advice on Parents’ Child Safety Behaviors: Randomized Controlled Trial
Source: J Med Internet Res. 2014 Jan 24;16(1):e17. doi: 10.2196/jmir.2521 (PMC3913924; doi:10.2196/jmir.2521)
Supplement: Supplementary file 5 [file jmir_v16i1e17_app5.pdf]

## Appendix 5. Risk scores\* assigned to injury safety behaviors

| Injury safety behavior |                                                                                             | Score |
|------------------------|---------------------------------------------------------------------------------------------|-------|
| Falls                  | Stair gate present only at top or bottom of stairs                                          | 2     |
|                        | No stair gate present                                                                       | 4     |
|                        | Closing stair gate often                                                                    | 2     |
|                        | Closing stair gate some of the time                                                         | 3     |
|                        | Rarely closing stair gate                                                                   | 4     |
|                        | Never closing stair gate                                                                    | 4     |
|                        | No window restrictor on windows a child can reach                                           | 2     |
| Poisoning              | Cleaning products stored unlocked above 1.50 m                                              | 1     |
|                        | Cleaning products stored unlocked below 1.50 m                                              | 3     |
|                        | Cleaning products stored on the floor                                                       | 4     |
|                        | Medicines stored unlocked above 1.50 m                                                      | 1     |
|                        | Medicines stored unlocked below 1.50 m                                                      | 3     |
|                        | Medicines stored on the floor                                                               | 4     |
|                        | Medicines stored in handbag                                                                 | 3     |
| Drowning               | Child left alone in bath tub                                                                | 5     |
|                        | Pond present                                                                                | 3     |
|                        | Pond with fence below 1.20 m                                                                | 4     |
|                        | Pond with no fence                                                                          | 5     |
|                        | Pool with fence below 1.20 m                                                                | 4     |
|                        | Pool with no fence                                                                          | 5     |
|                        | Often wearing (inflatable) flotation device when swimming                                   | 1     |
|                        | Some of the time wearing (inflatable) flotation device when swimming                        | 2     |
|                        | Rarely wearing (inflatable) flotation device when swimming                                  | 2     |
|                        | Never wearing (inflatable) flotation device when swimming                                   | 2     |
|                        | Left alone in pool                                                                          | 5     |
| Burns                  | No thermostatic controlled taps on hot water taps in bath or shower                         | 4     |
|                        | Child on parents' lap when drinking hot liquids                                             | 4     |
|                        | Not using a stove guard                                                                     | 1     |
|                        | Child in kitchen when parent is cooking                                                     | 2     |
|                        | Not using rear hotplates, when a stove guard is not present                                 | 1     |
|                        | Not turning panhandles away from the front of the cooker, when a stove guard is not present | 1     |

\* Risk scores based on literature and expert consultation (Consumer Safety Institute, the Netherlands); when a situation is not applicable or safe, risk score is equal to 0. Higher scores indicate more unsafe behavior
